# Supplementary material
Source: PubMed Central journal article supplement (PMC8380510)
Supplement: NIHMS1727708-supplement-Supplemental_Material.pdf [file NIHMS1727708-supplement-Supplemental_Material.pdf]

**Supplemental Table S1.** Descriptive Correlations (Spearman's rho) for TOMM Accuracy and Pupil Indices and Demographic Characteristics ( $N = 175$ ).

| Variable                       | Trial 1 |           |       | Trial 2 |           |       |
|--------------------------------|---------|-----------|-------|---------|-----------|-------|
|                                | Age     | Education | WTAR  | Age     | Education | WTAR  |
| Trial Accuracy                 | .27**   | -.04      | -.07  | .21**   | -.14*     | -.14* |
| Effort-Max                     | -.36**  | .20**     | .28** | -.42**  | .15*      | .26** |
| View-Familiar (Max)            | -.37**  | .21**     | .30** | -.42**  | .16*      | .26** |
| View-Unfamiliar (Max)          | -.38**  | .20**     | .28** | -.43**  | .17*      | .27** |
| Response-Familiar (Max)        | -.36**  | .21**     | .29** | -.42**  | .16*      | .28** |
| Response-Unfamiliar (Max)      | -.39**  | .21**     | .37** | -.46**  | .10       | .31** |
| Effort-Baseline                | -.34**  | .23**     | .29** | -.37**  | .21**     | .27** |
| View-Familiar (Baseline)       | -.35**  | .22**     | .29** | -.39**  | .19**     | .23** |
| View-Unfamiliar (Baseline)     | -.35**  | .21**     | .28** | -.38**  | .20**     | .27** |
| Response-Familiar (Baseline)   | -.34**  | .25**     | .31** | -.37**  | .23**     | .29** |
| Response-Unfamiliar (Baseline) | -.39**  | .23**     | .34** | -.41**  | .13       | .30** |
| Effort-Range                   | -.14    | -.02      | .03   | -.18*   | -.08      | .02   |
| Familiarity-Difference         | .20**   | -.01      | .03   | .16*    | .04       | .05   |

Note. WTAR = Wechsler Test of Adult Reading. See Table 1 for pupil variable abbreviation key.

\*  $p < .05$ , \*\*  $p < .01$ .
